# Supplementary material for: Transcriptome analysis of Hpa1Xoo transformed cotton revealed constitutive expression of genes in multiple signalling pathways related to disease resistance
Source: PubMed Central journal article supplement — J Exp Bot. 2010 Jul 28;61(15):4263–75. doi: 10.1093/jxb/erq227 (PMC2955741; doi:10.1093/jxb/erq227), 2010-07-28
Supplement: supp_erq227_00044321-file001.pdf [file supp_erq227_00044321-file001.pdf]

***HpaI*<sub>Xoo</sub>-Mediated Transcriptome in Transgenic Cotton Reveals the Constitutively Expressed Diverse Defense genes in Multiple Signaling Pathways Associated with Hypersensitive Cell Death.** Weiguo Miao, Xiben Wang, Congfeng Song, Yu Wang, Yonghong Ren, Jinsheng Wang

**Supplemental TABLE S1. Expression ratio of forty internal control genes in leaves and roots of transgenic T-34 cotton versus the wild type Z35 cotton**

| Array ID | Expression ratio in different microarrays |           |           |           |           |           | Annotation                       |
|----------|-------------------------------------------|-----------|-----------|-----------|-----------|-----------|----------------------------------|
|          | L1*                                       | L2        | L3        | R1        | R2        | R3        |                                  |
| CM061D06 | 1.16±0.08                                 | 1.20±0.05 | 1.00±0.33 | 0.80±0.23 | 0.80±0.13 | 0.84±0.27 | DNA-directed RNA polymerase 23kD |
| CM044A05 | 1.07±0.06                                 | 0.87±0.13 | 0.84±0.19 | 0.83±0.15 | 1.03±0.11 | 0.88±0.14 | RNA polymerase II subunit        |
| CM043E09 | 1.05±0.10                                 | 1.04±0.10 | 1.04±0.25 | 0.93±0.16 | 0.98±0.11 | 0.90±0.10 | UBQ2                             |
| CM048F04 | 1.22±0.08                                 | 0.92±0.07 | 0.92±0.21 | 0.94±0.07 | 0.85±0.12 | 0.95±0.11 | UBQ7                             |
| CM020A01 | 0.97±0.07                                 | 0.87±0.07 | 0.79±0.09 | 0.84±0.09 | 0.95±0.07 | 0.88±0.08 | GAPDH1                           |
| CM101F12 | 1.20±0.10                                 | 0.92±0.11 | 0.84±0.09 | 0.90±0.18 | 1.06±0.16 | 0.86±0.27 | GAPDH2                           |
| CM116D08 | 1.04±0.10                                 | 0.80±0.11 | 0.81±0.09 | 0.75±0.15 | 0.93±0.07 | 0.81±0.13 | eIF3                             |
| CM066B07 | 1.19±0.09                                 | 0.88±0.05 | 0.95±0.19 | 0.89±0.15 | 0.96±0.10 | 0.96±0.14 | eIF3E                            |
| CM114E02 | 1.03±0.05                                 | 0.81±0.11 | 0.94±0.07 | 0.83±0.13 | 0.90±0.11 | 0.83±0.14 | eIF4B                            |
| CM122C06 | 1.03±0.11                                 | 0.79±0.07 | 1.06±0.13 | 0.88±0.13 | 1.03±0.15 | 1.02±0.15 | eIF4                             |
| CM012B11 | 1.06±0.06                                 | 1.04±0.14 | 1.05±0.36 | 0.84±0.16 | 1.01±0.20 | 0.90±0.21 | eIF5A                            |
| CM013H04 | 1.03±0.12                                 | 0.92±0.23 | 0.97±0.19 | 0.91±0.13 | 1.37±0.19 | 1.38±0.30 | alpha tubulin                    |
| CM115A05 | 1.17±0.15                                 | 0.73±0.11 | 1.18±0.30 | 0.85±0.24 | 0.76±0.20 | 0.95±0.18 | beta tubulin                     |
| CM023B03 | 0.91±0.07                                 | 0.92±0.07 | 0.99±0.18 | 0.92±0.14 | 0.97±0.08 | 1.02±0.22 | Ubiquinol-cytochrome C reductase |
| CM043F09 | 0.82±0.06                                 | 1.09±0.05 | 0.94±0.19 | 0.78±0.08 | 0.85±0.11 | 0.79±0.10 | cytochrome c oxidase subunit     |
| CM008G11 | 0.98±0.05                                 | 1.00±0.12 | 1.15±0.13 | 0.99±0.18 | 0.93±0.07 | 0.90±0.11 | actin                            |
| CM075H12 | 1.17±0.11                                 | 1.00±0.08 | 0.89±0.15 | 0.95±0.19 | 0.84±0.14 | 0.97±0.15 | actin                            |
| CM065A03 | 1.25±0.08                                 | 0.90±0.20 | 0.91±0.19 | 0.76±0.13 | 0.84±0.19 | 0.88±0.20 | RNA-dependent DNA polymerase 1   |

|              |           |           |           |           |           |           |                                         |
|--------------|-----------|-----------|-----------|-----------|-----------|-----------|-----------------------------------------|
| CM122A09     | 1.03±0.07 | 0.74±0.04 | 0.99±0.29 | 0.89±0.19 | 0.93±0.24 | 0.99±0.34 | RNA-dependent DNA polymerase 2          |
| CM015A09     | 1.10±0.13 | 0.93±0.07 | 0.92±0.18 | 0.79±0.17 | 0.96±0.15 | 0.85±0.17 | RNA-dependent DNA polymerase 3          |
| CM012B10     | 0.88±0.11 | 1.15±0.22 | 1.14±0.36 | 1.18±0.25 | 0.85±0.17 | 1.01±0.32 | NADH-ubiquinone oxidoreductase          |
| CM034G09     | 1.23±0.11 | 1.14±0.08 | 0.81±0.16 | 0.82±0.06 | 0.94±0.08 | 0.91±0.07 | RPS17D                                  |
| CM012A12     | 1.06±0.11 | 1.04±0.04 | 1.10±0.36 | 0.83±0.11 | 0.85±0.11 | 0.92±0.23 | RPS25B                                  |
| CM059B06     | 1.14±0.13 | 1.08±0.13 | 0.99±0.28 | 0.91±0.25 | 0.98±0.13 | 0.94±0.33 | RPS27B                                  |
| CM038C05     | 1.05±0.12 | 0.91±0.13 | 0.92±0.13 | 0.90±0.12 | 0.91±0.15 | 0.74±0.06 | RPS29A                                  |
| CM068F03     | 1.06±0.10 | 0.83±0.07 | 1.13±0.18 | 0.90±0.12 | 1.16±0.19 | 0.94±0.17 | RPS29A                                  |
| CM100E02     | 1.02±0.09 | 0.91±0.17 | 1.33±0.18 | 1.06±0.30 | 0.92±0.12 | 0.83±0.19 | RPL12C                                  |
| CM084E07     | 0.95±0.10 | 0.86±0.11 | 0.84±0.14 | 0.86±0.12 | 0.97±0.10 | 0.80±0.10 | RPL14A                                  |
| CM100D03     | 1.16±0.11 | 0.77±0.19 | 0.93±0.19 | 0.84±0.13 | 0.97±0.18 | 0.88±0.20 | RPL18A                                  |
| CM059B03     | 1.15±0.11 | 0.95±0.10 | 0.88±0.12 | 0.87±0.06 | 0.98±0.10 | 0.93±0.05 | RPL19B                                  |
| CM095E11     | 1.03±0.10 | 0.84±0.24 | 0.87±0.15 | 0.75±0.15 | 0.77±0.10 | 0.77±0.17 | RPL26B                                  |
| CM085F08     | 0.99±0.03 | 0.85±0.12 | 0.80±0.12 | 0.89±0.13 | 0.96±0.08 | 0.77±0.18 | RPL35D                                  |
| CM016F03     | 1.17±0.06 | 1.00±0.01 | 0.85±0.15 | 1.02±0.15 | 1.01±0.11 | 1.04±0.24 | RPL3B                                   |
| CM035E03     | 1.14±0.05 | 0.97±0.08 | 0.84±0.14 | 0.83±0.11 | 0.92±0.11 | 0.81±0.08 | aminoacyl-t-RNA synthetase              |
| CM065D11     | 1.02±0.06 | 0.89±0.04 | 0.88±0.03 | 0.76±0.07 | 0.87±0.12 | 0.76±0.08 | leucyl-tRNA synthetase                  |
| CM068F09     | 1.08±0.05 | 0.89±0.08 | 0.90±0.11 | 0.84±0.06 | 1.07±0.13 | 0.98±0.10 | methionyl-tRNA synthetase               |
| CM004D01     | 0.82±0.03 | 1.03±0.13 | 1.01±0.26 | 1.07±0.09 | 0.95±0.03 | 0.93±0.11 | malate oxidoreductase                   |
| CM061H02     | 1.14±0.11 | 0.97±0.14 | 0.99±0.18 | 0.94±0.21 | 0.78±0.10 | 0.92±0.20 | cinnamoyl-CoA reductase                 |
| CM074F01     | 1.01±0.05 | 0.87±0.10 | 1.06±0.07 | 0.91±0.11 | 0.85±0.05 | 0.98±0.09 | 2-oxoglutarate dehydrogenase E2 subunit |
| CM073A11     | 1.16±0.06 | 0.84±0.04 | 0.95±0.20 | 0.74±0.13 | 0.91±0.20 | 0.91±0.14 | glycosyltransferase family              |
| Total volume | 42.73     | 37.16     | 38.44     | 35.00     | 37.58     | 36.32     |                                         |
| Average      | 1.14      | 0.99      | 1.02      | 0.93      | 1.00      | 0.97      |                                         |

\*L1, L2, and L3 represented three biological replicates from leaves and R1, R2, and R3 represented three biological replicates from roots
